# Supplementary material for: Prediction of alternative isoforms from exon expression levels in RNA-Seq experiments
Source: PubMed Central journal article supplement — Nucleic Acids Res. 2010 Feb 11;38(10):e112. doi: 10.1093/nar/gkq041 (PMC2879520; doi:10.1093/nar/gkq041), 2010-02-11
Supplement: gkq041_2.pdf [file gkq041_2.pdf]

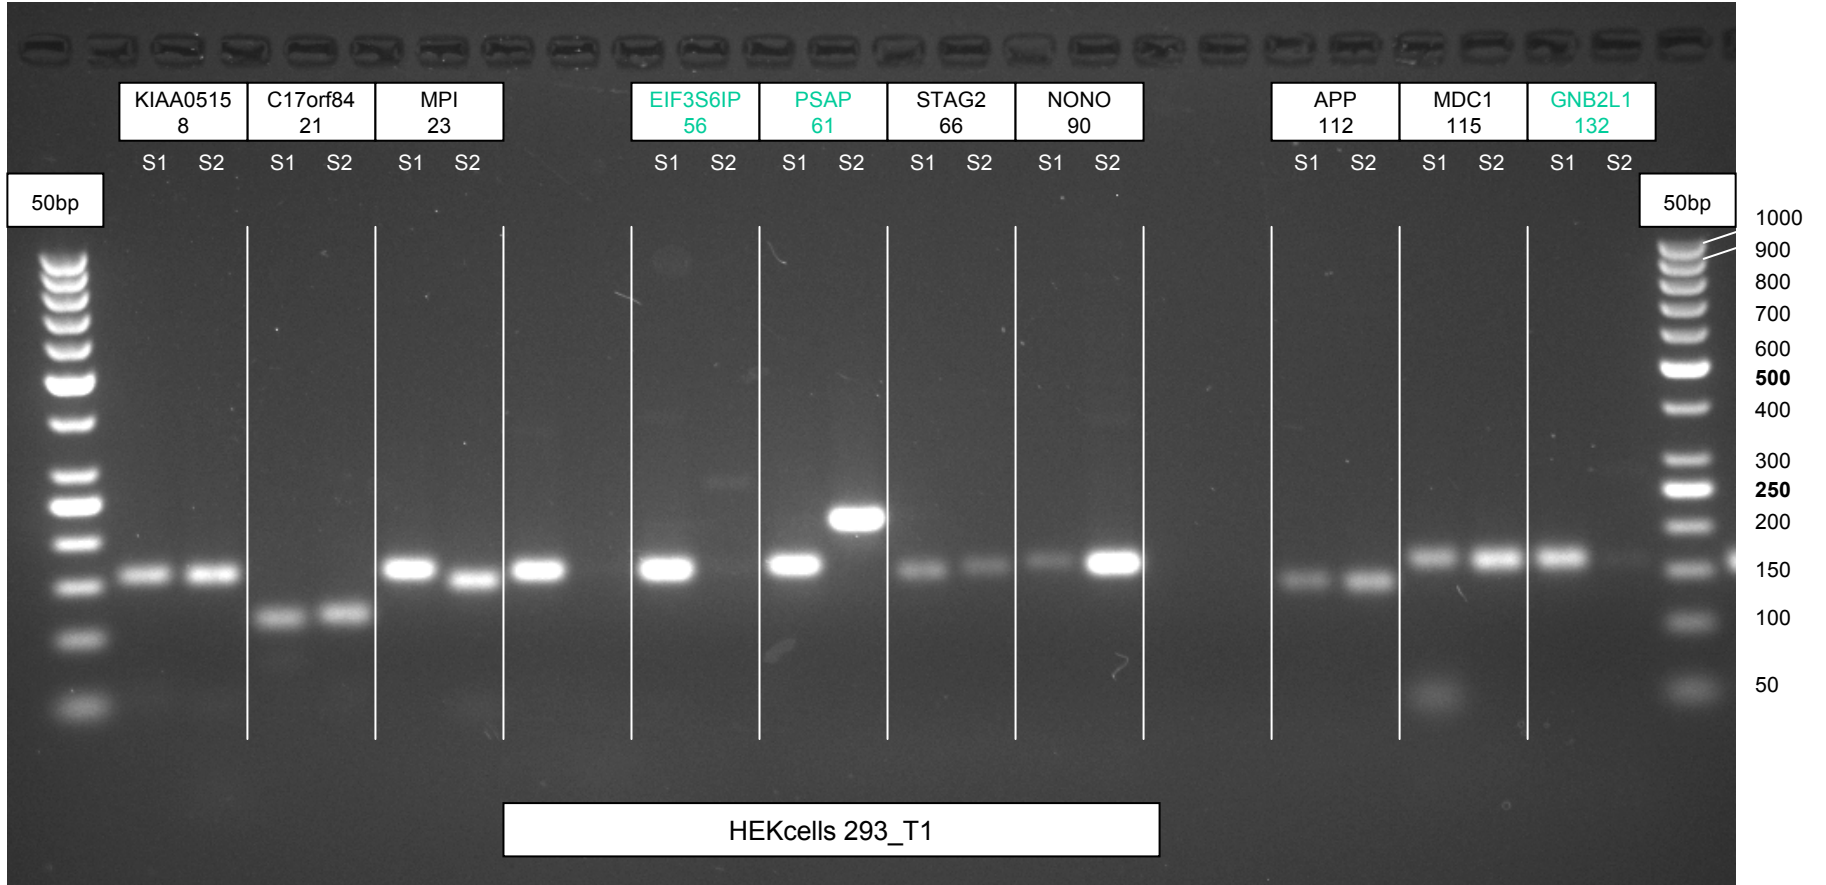

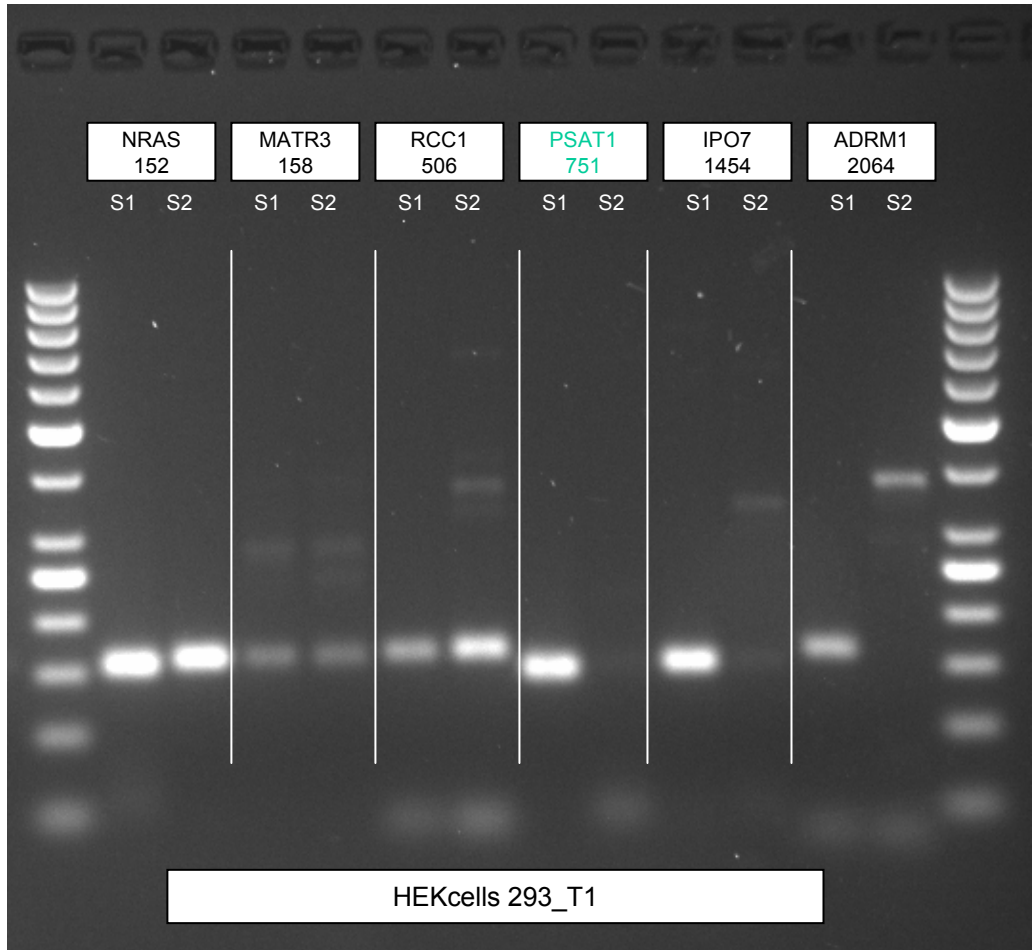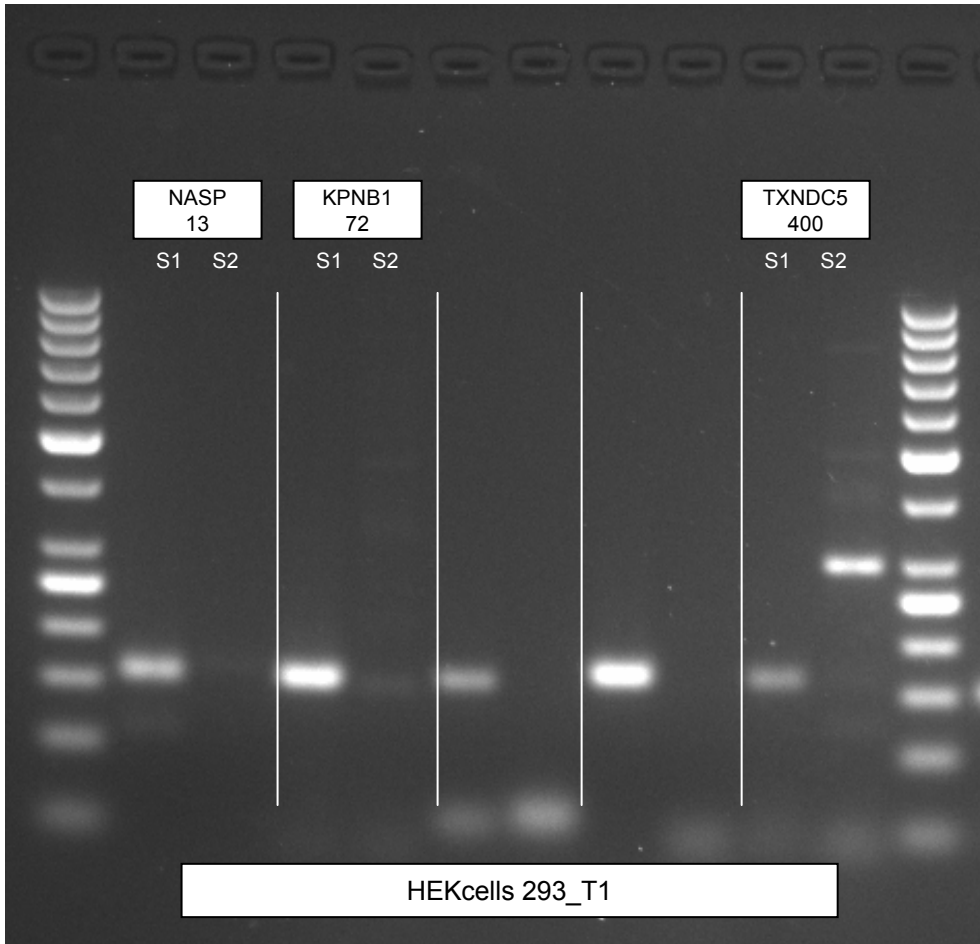

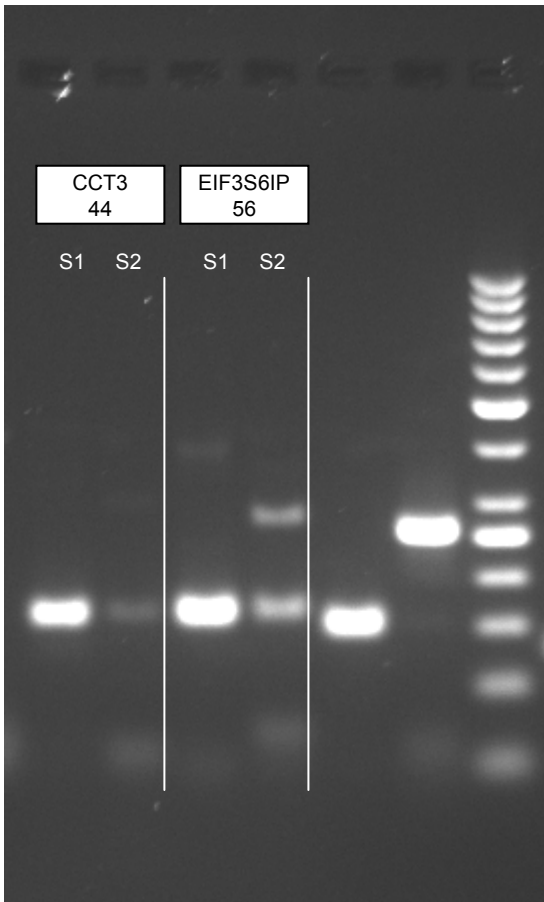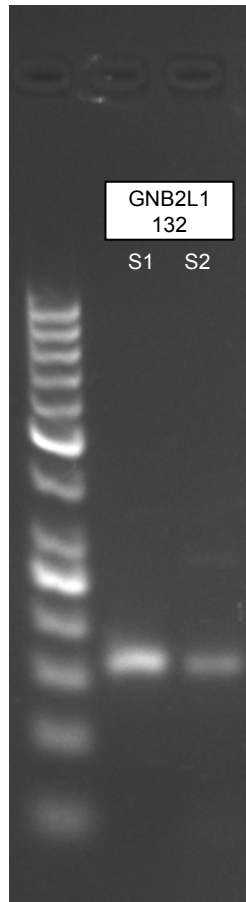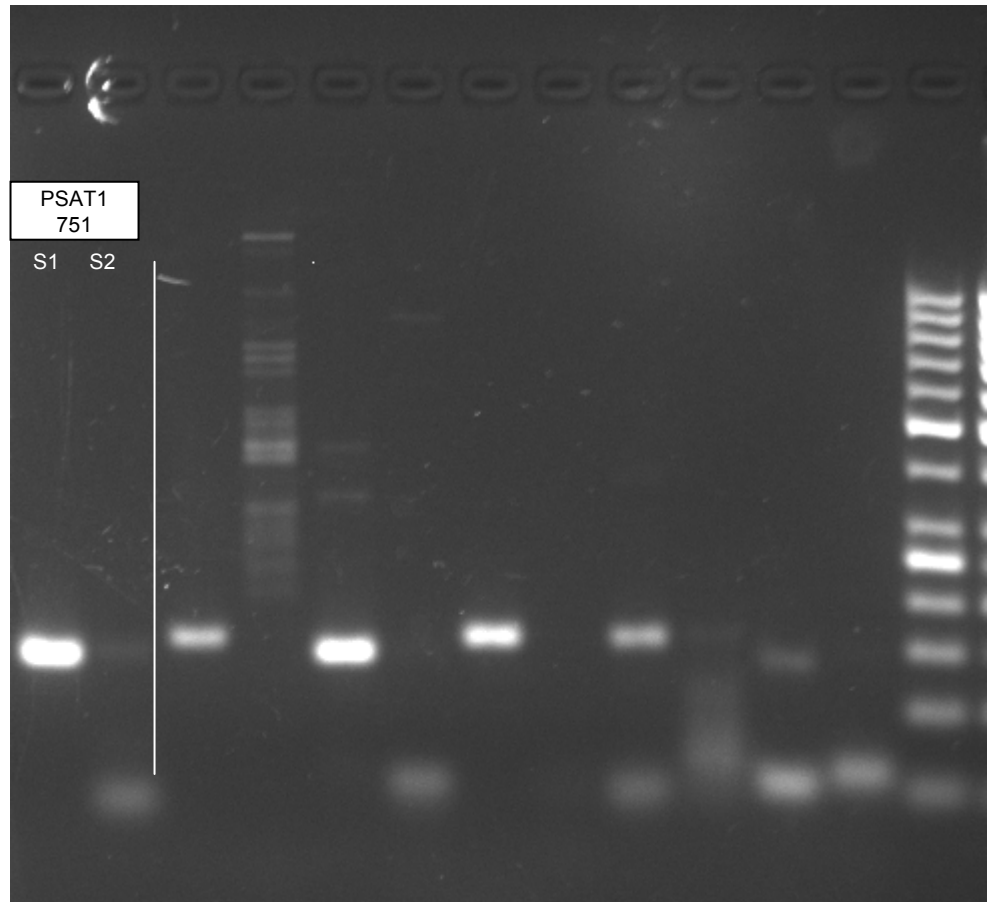

HEKcells 293\_T1

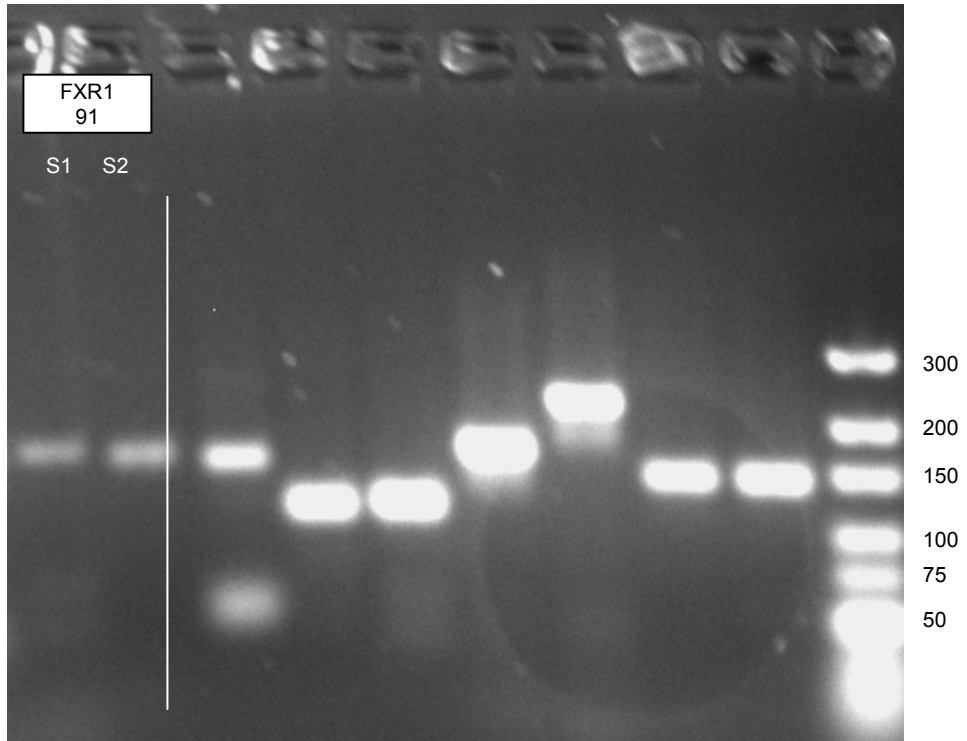

HEKcells 293\_T1

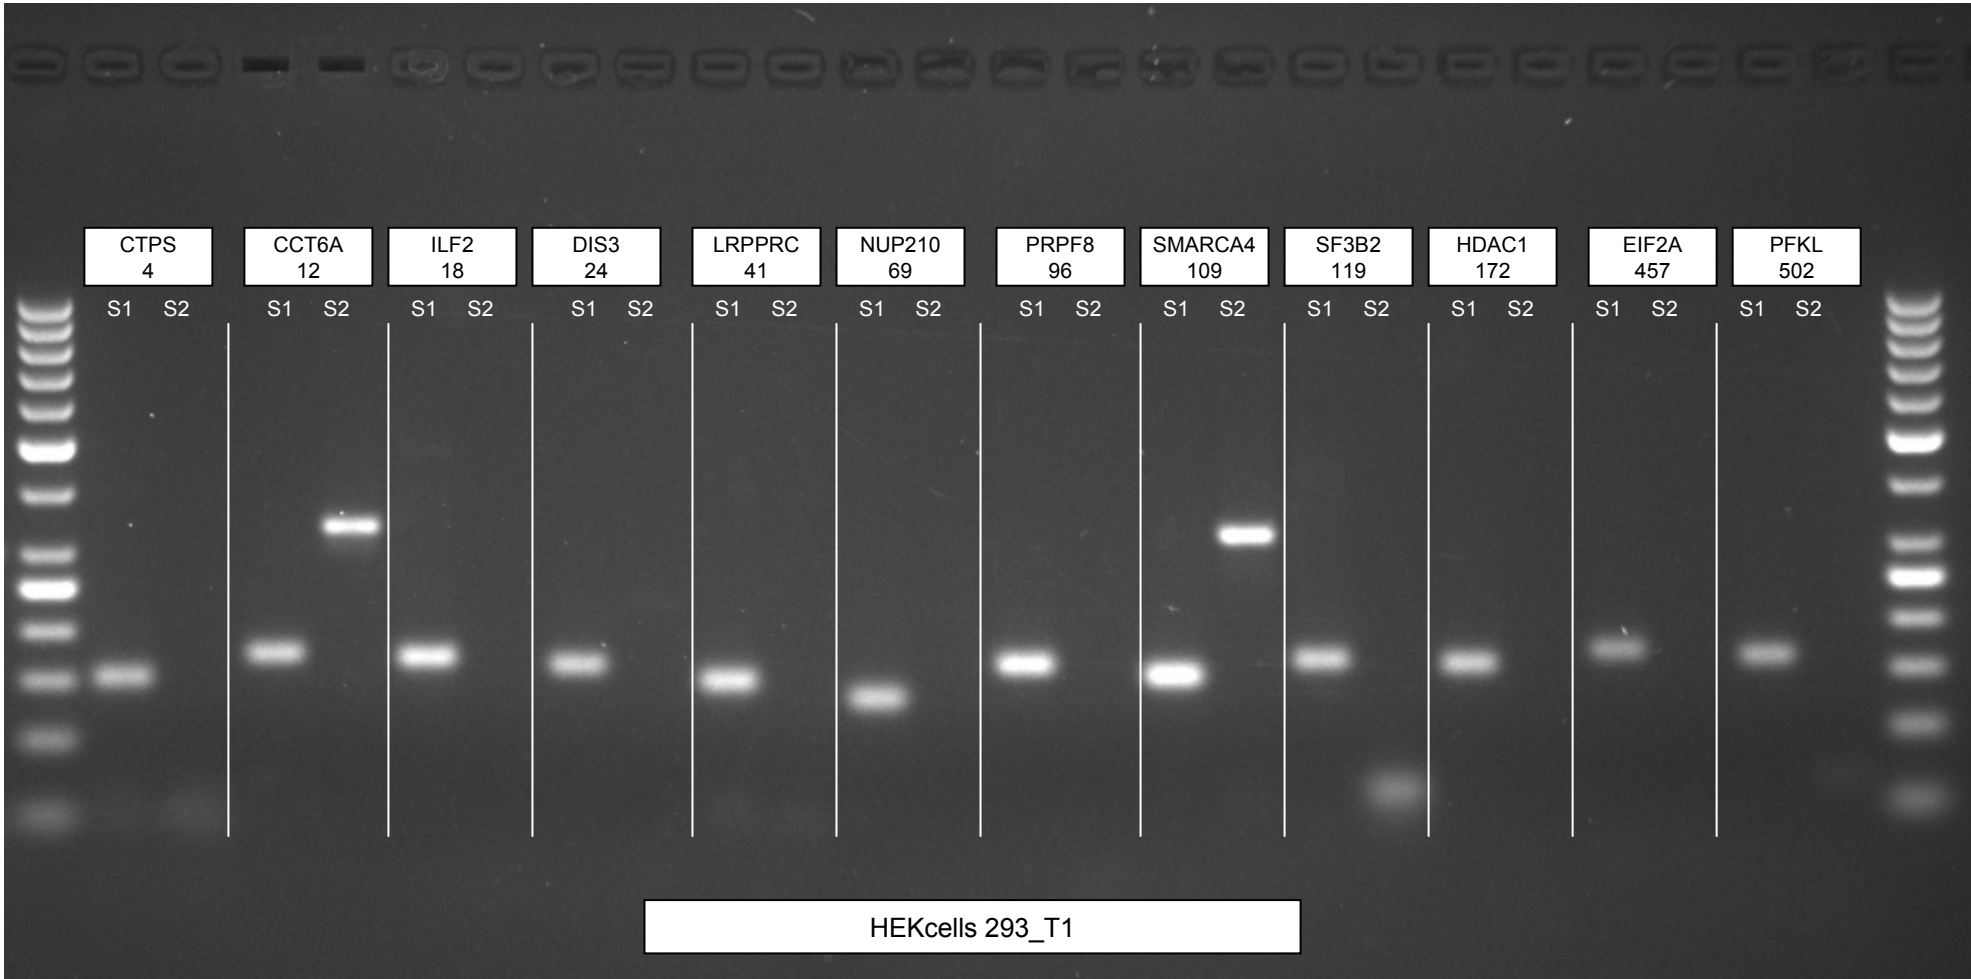

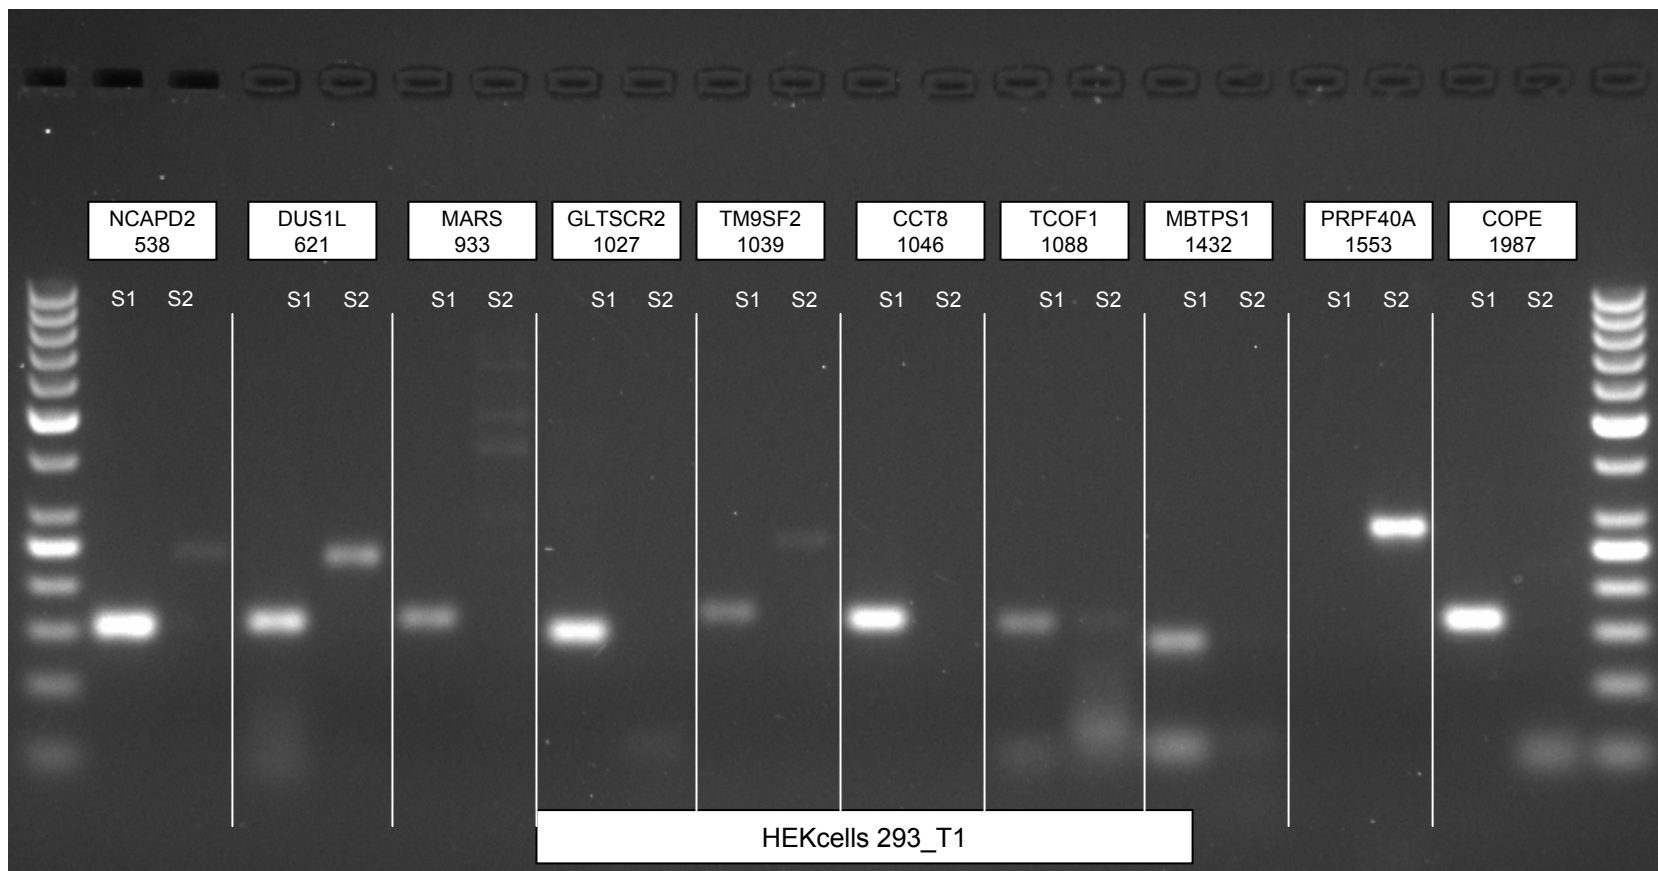

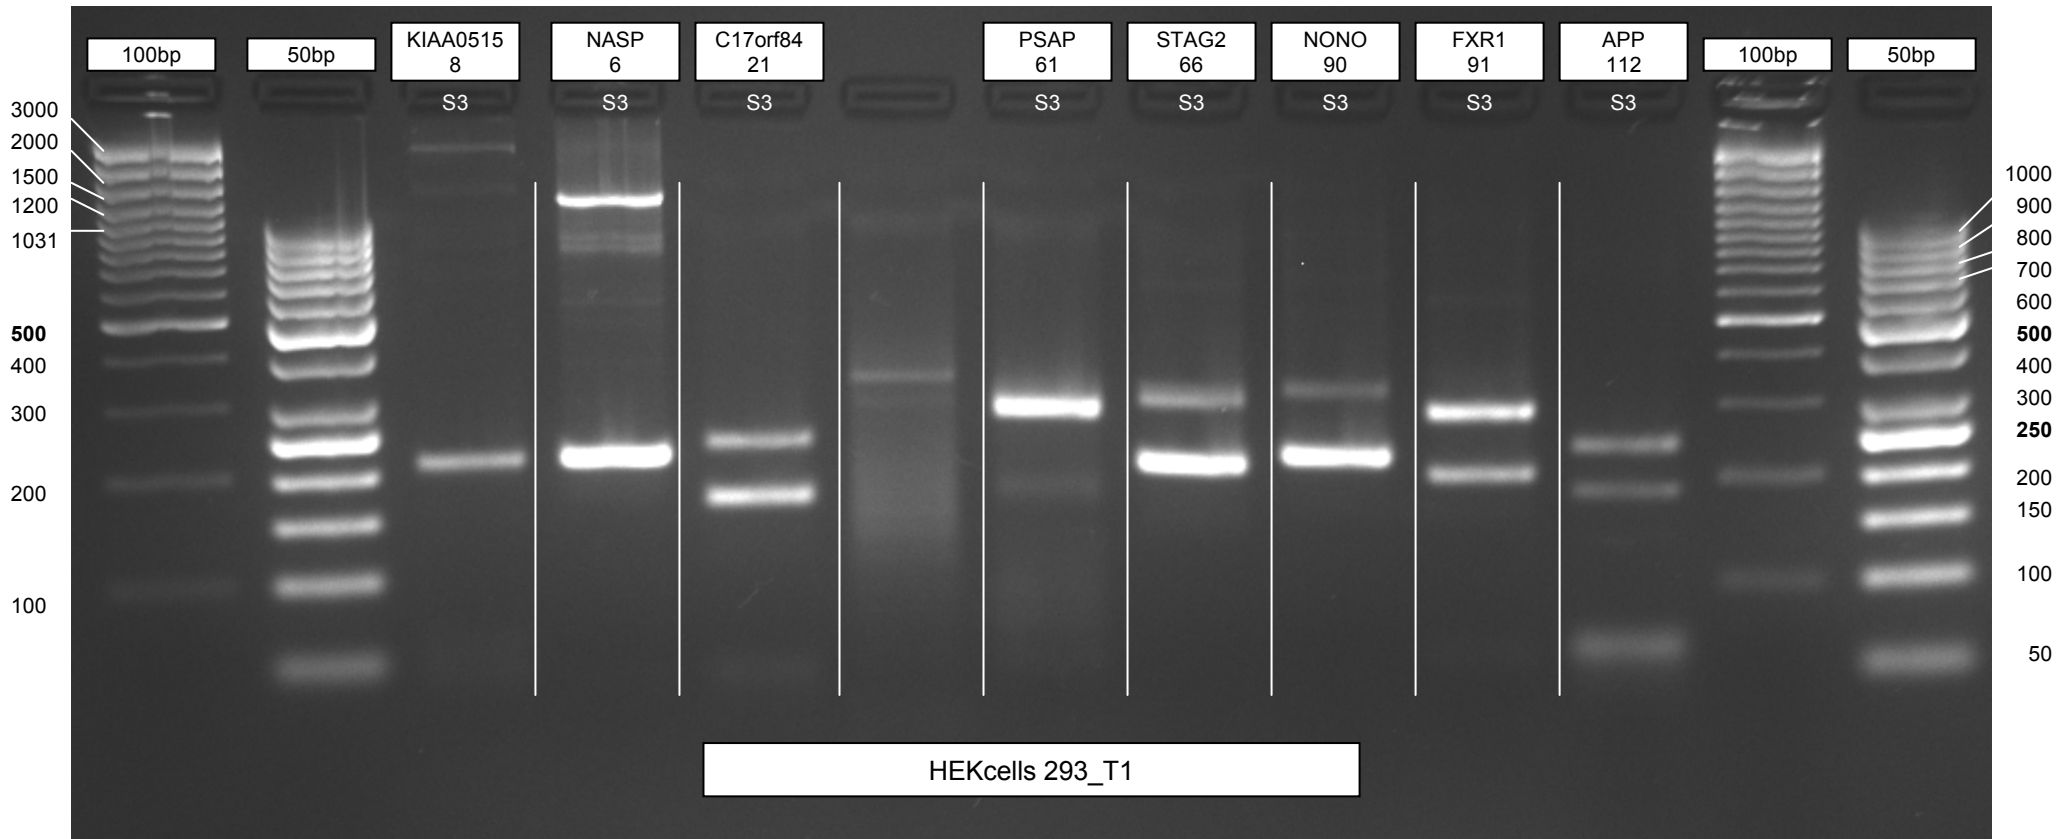

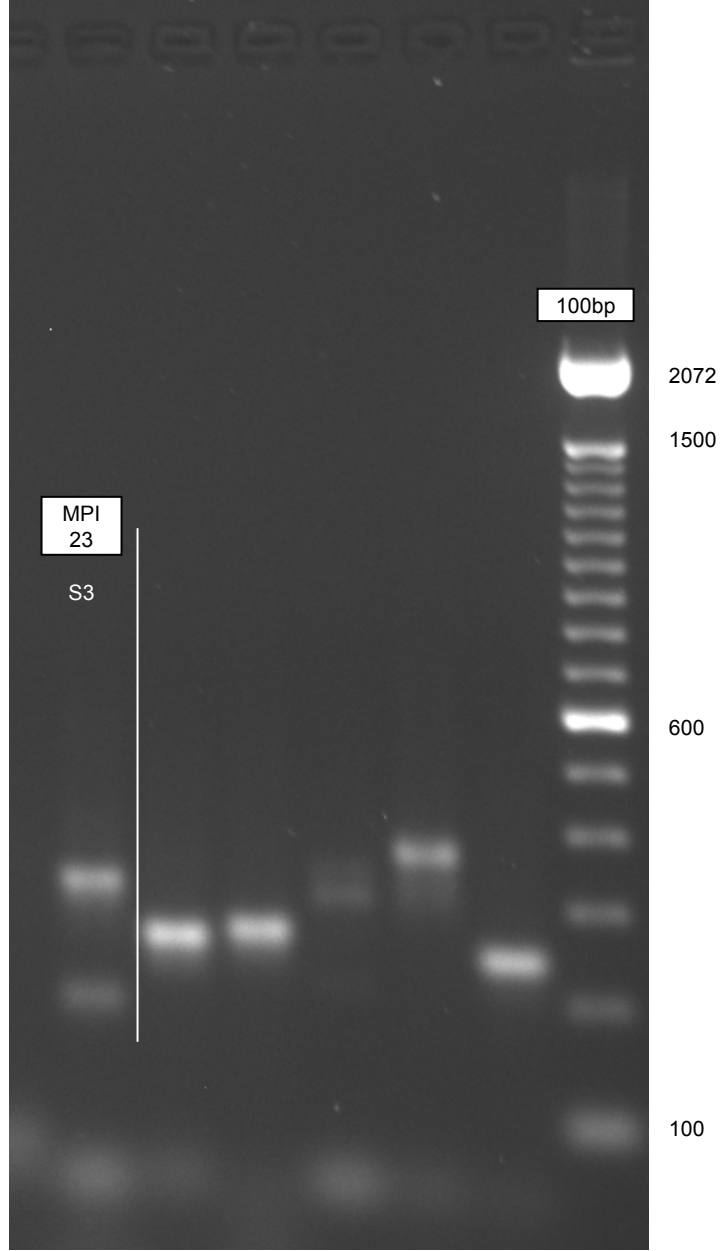

HEKcells 293\_T1



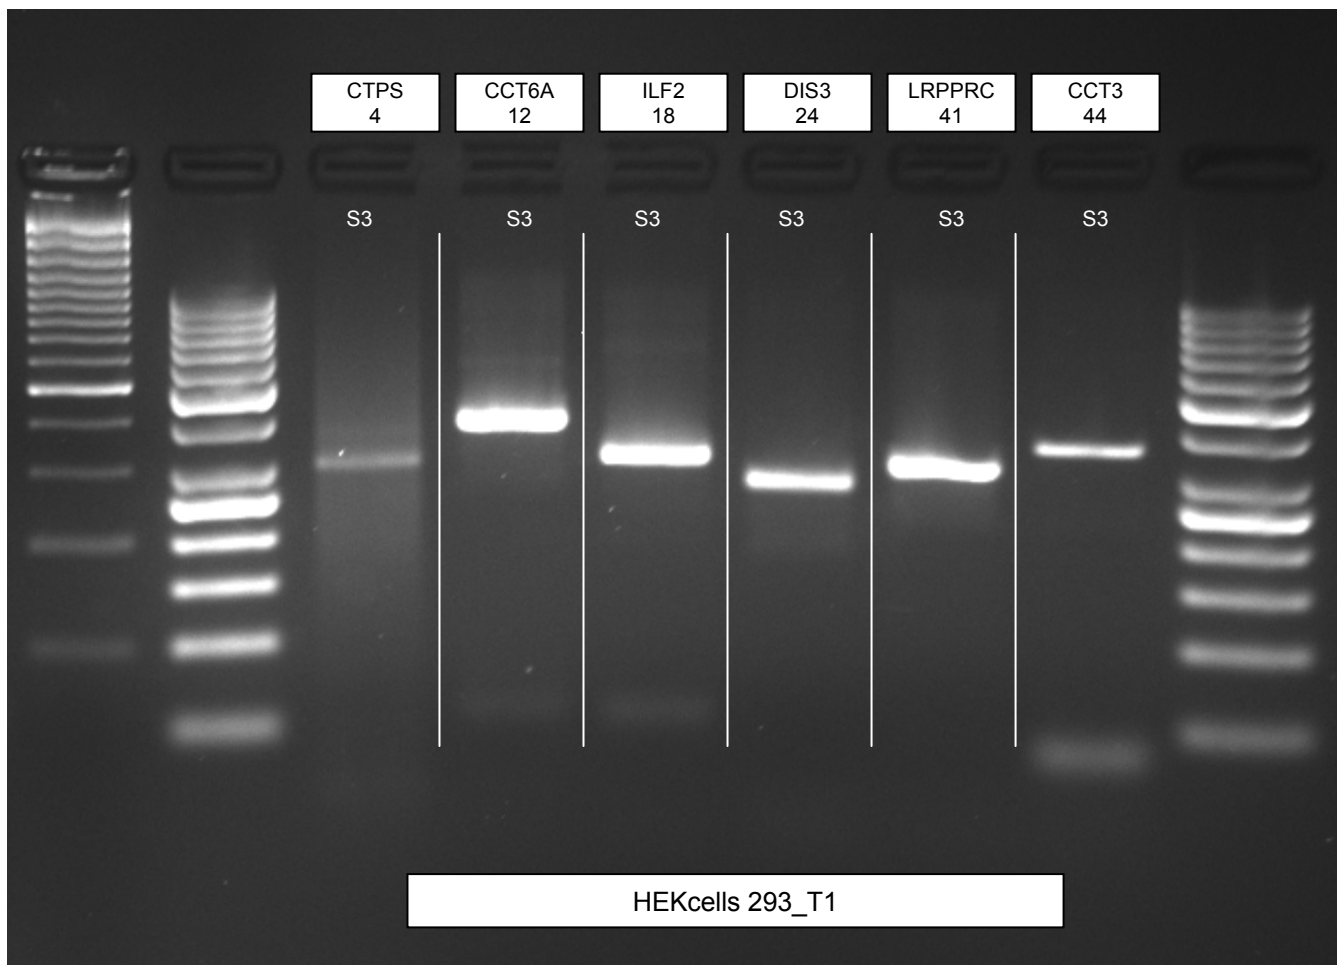



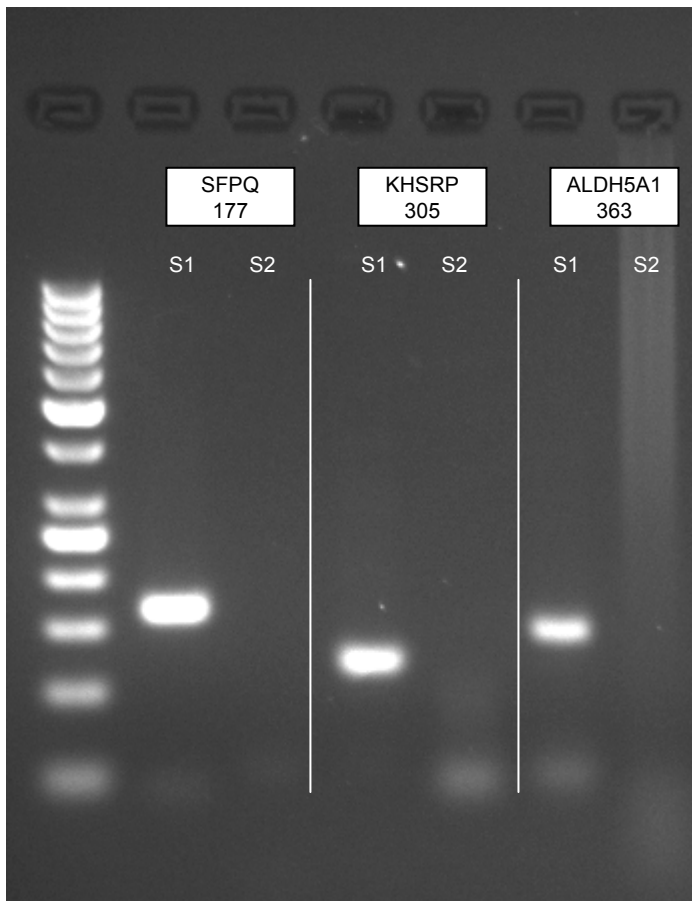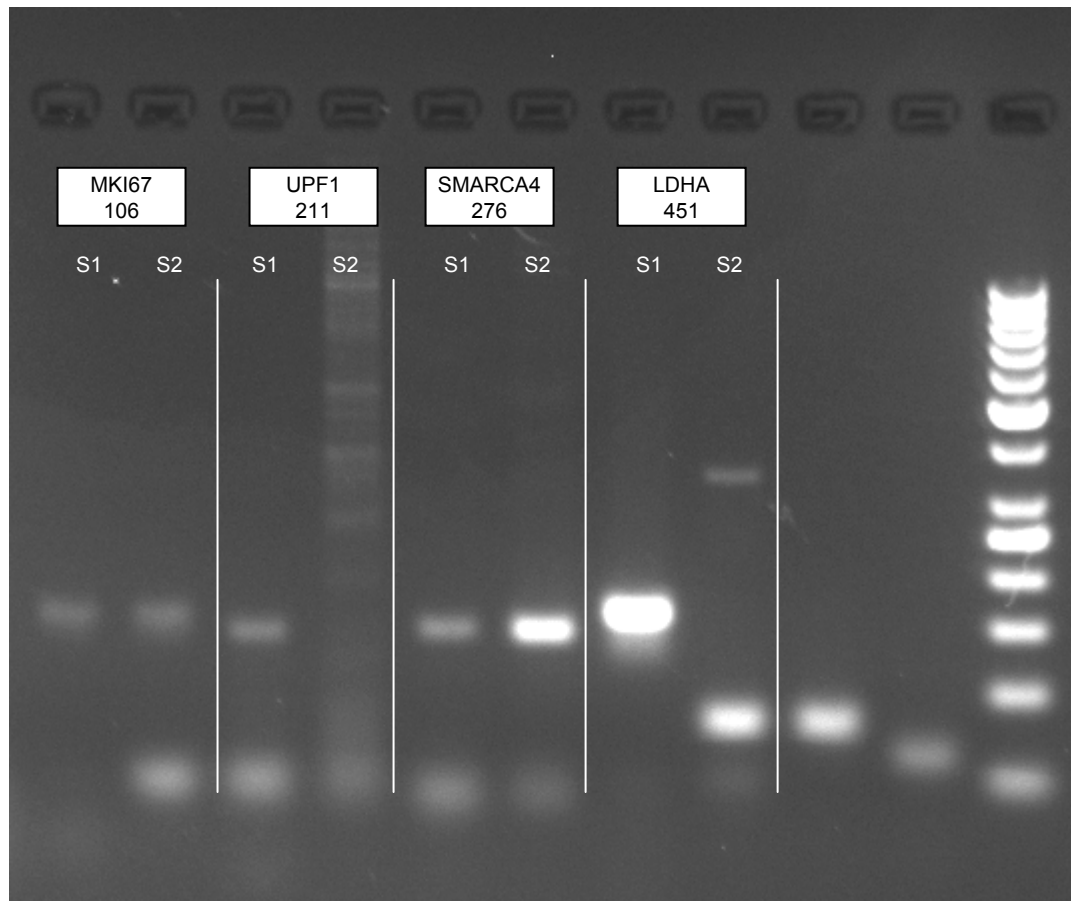

B-cells HSA 3

NO Validation

YES Validation

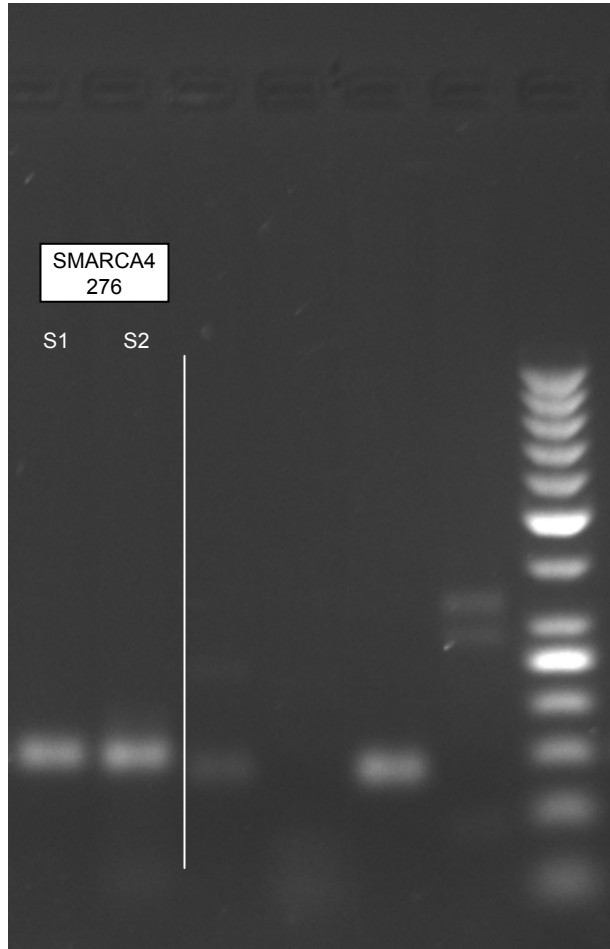

B-cells HSA 2

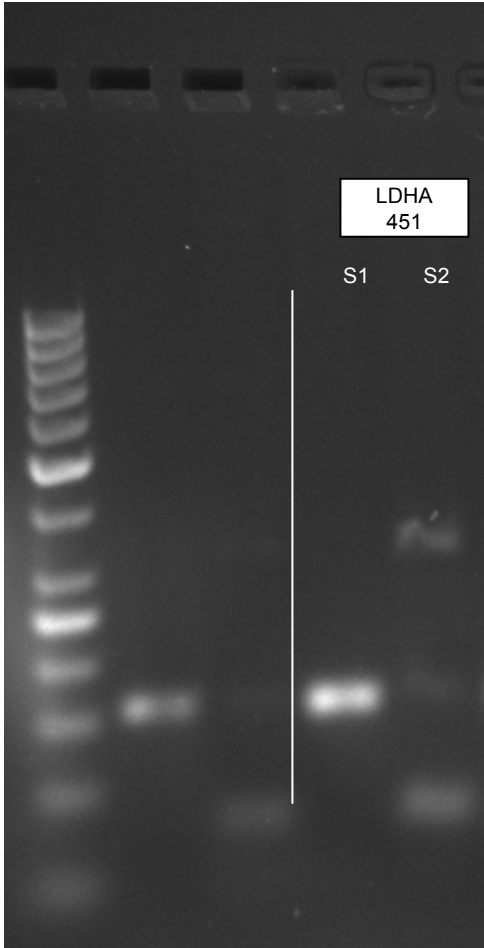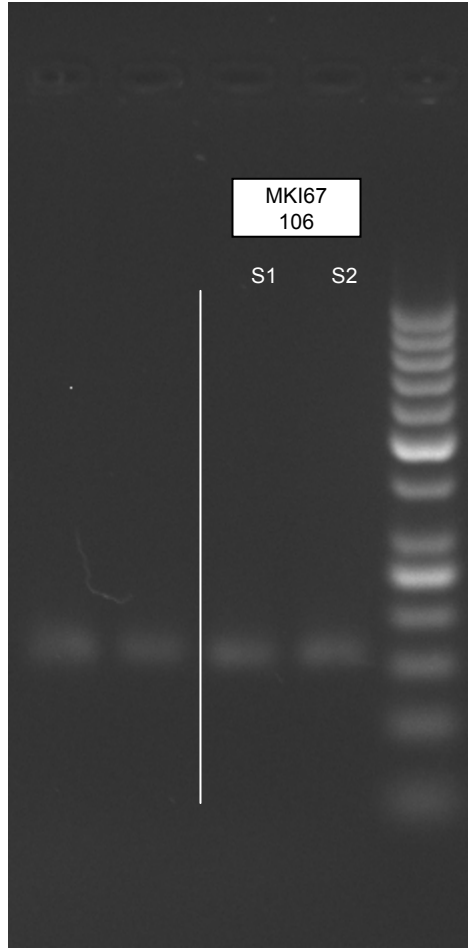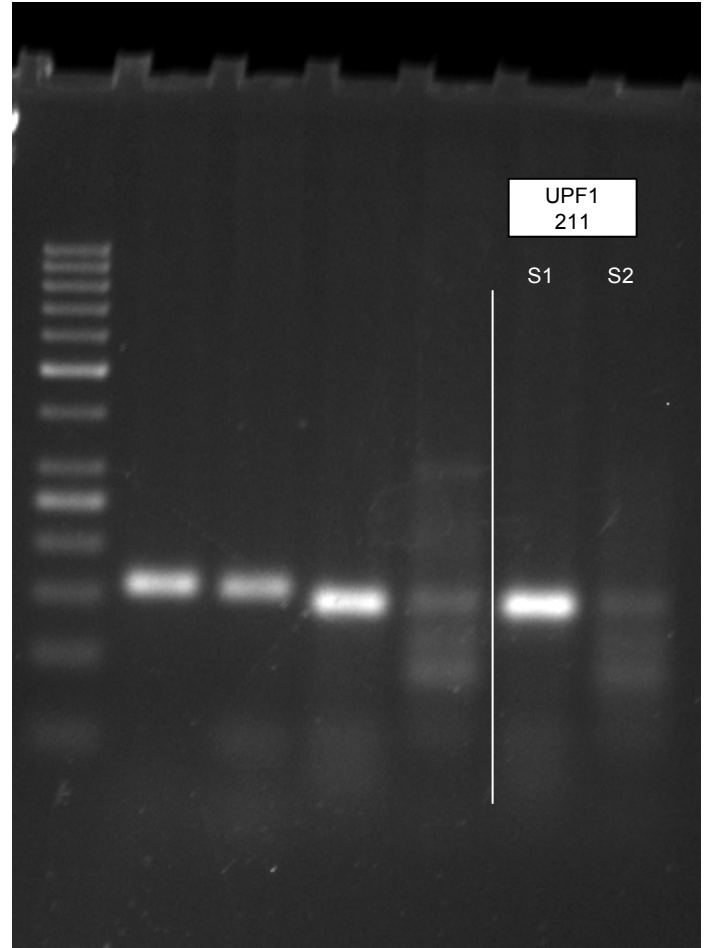

B-cells HSA 1

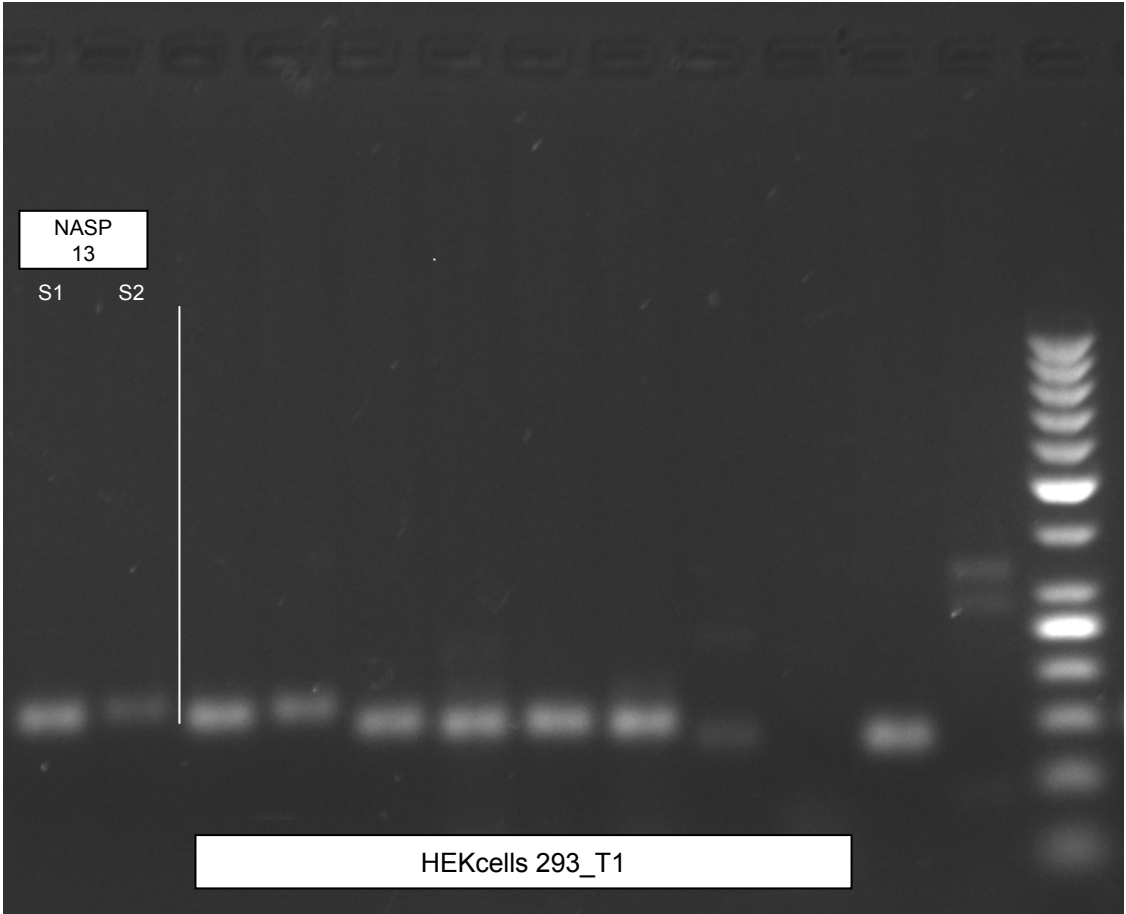

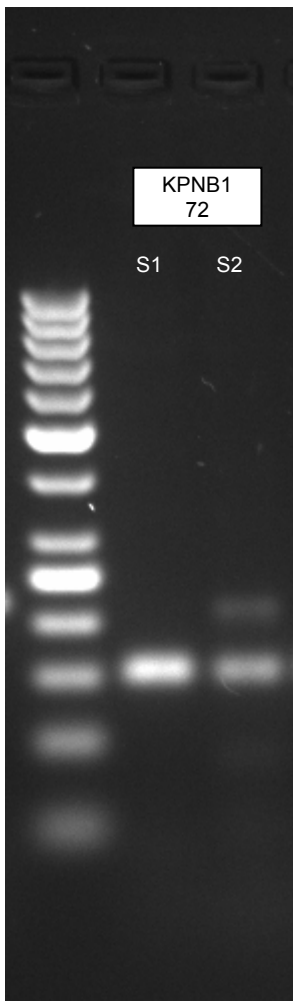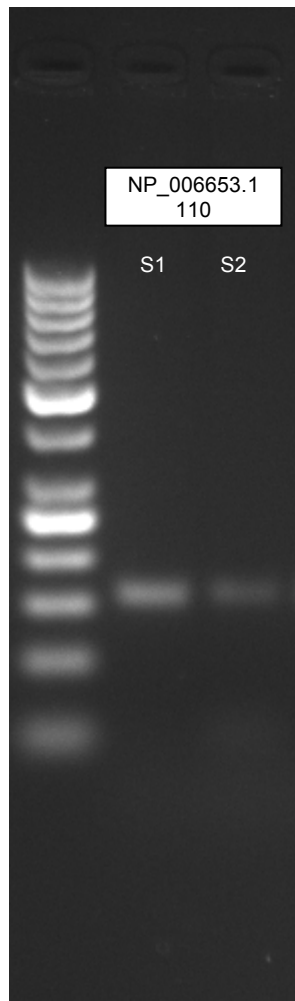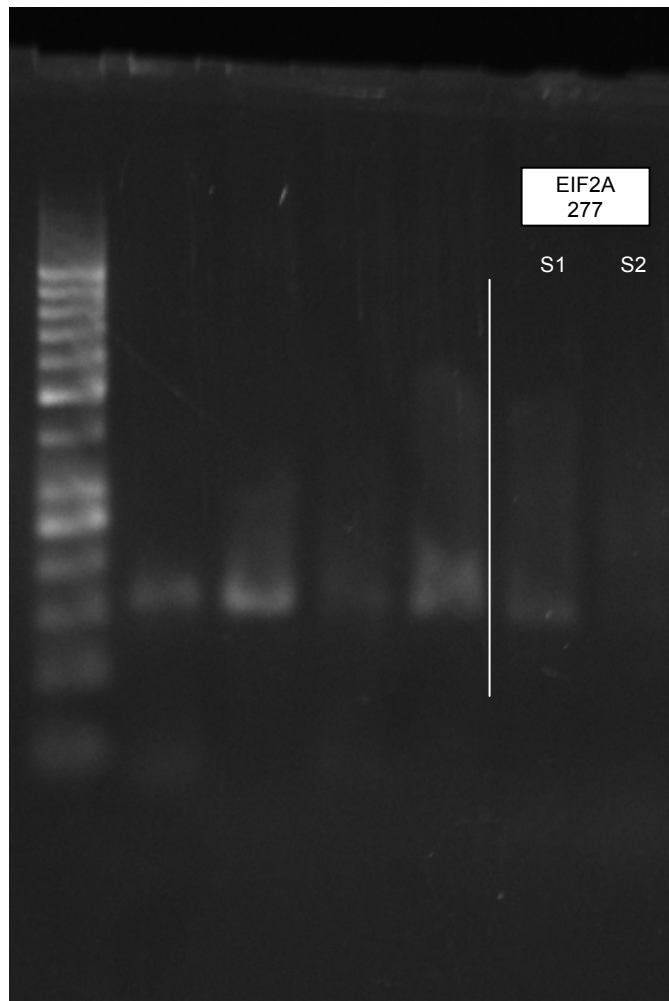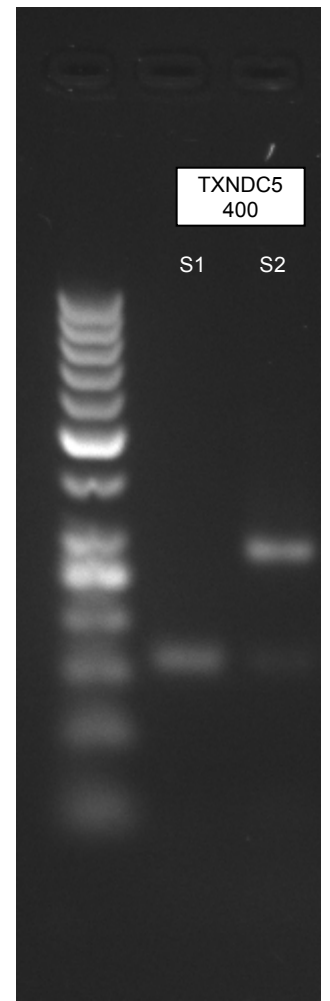

HEKcells 293\_T4

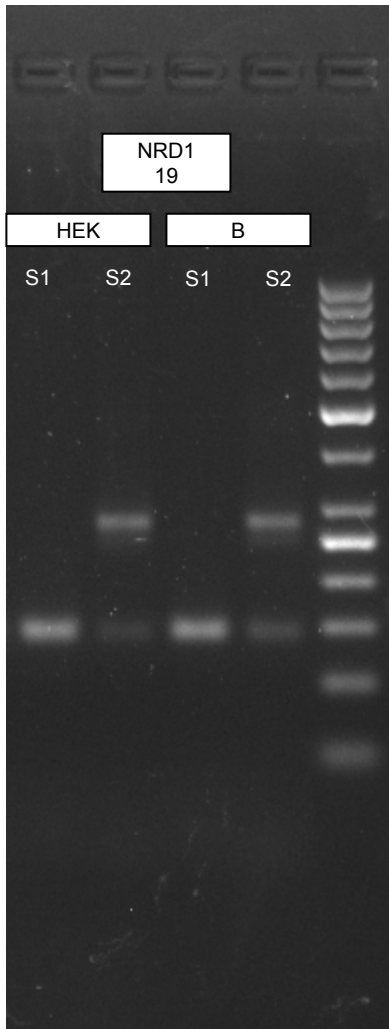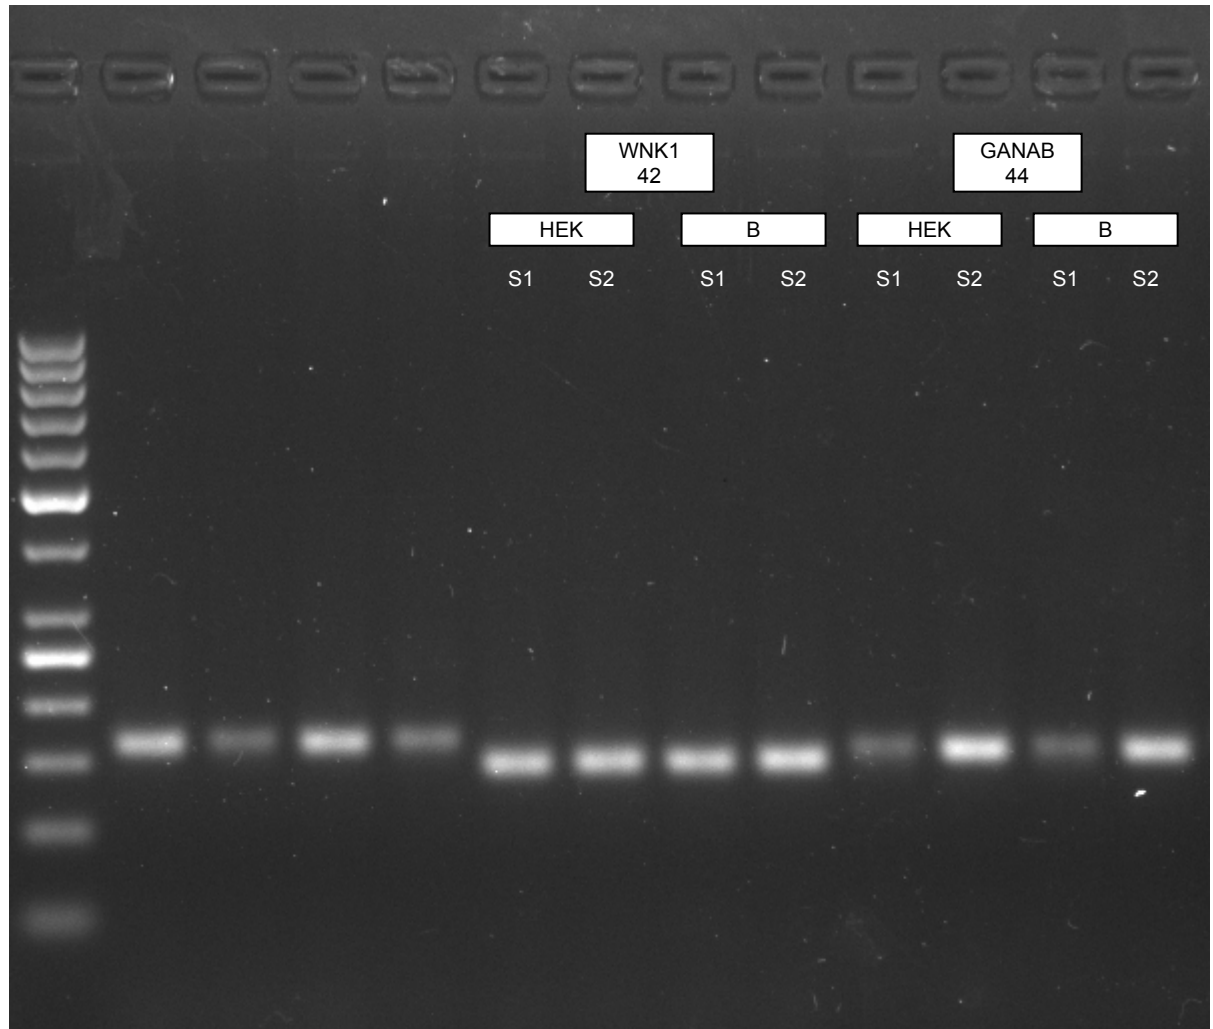

HEKcells 293\_T2 + B-cells HSA 2



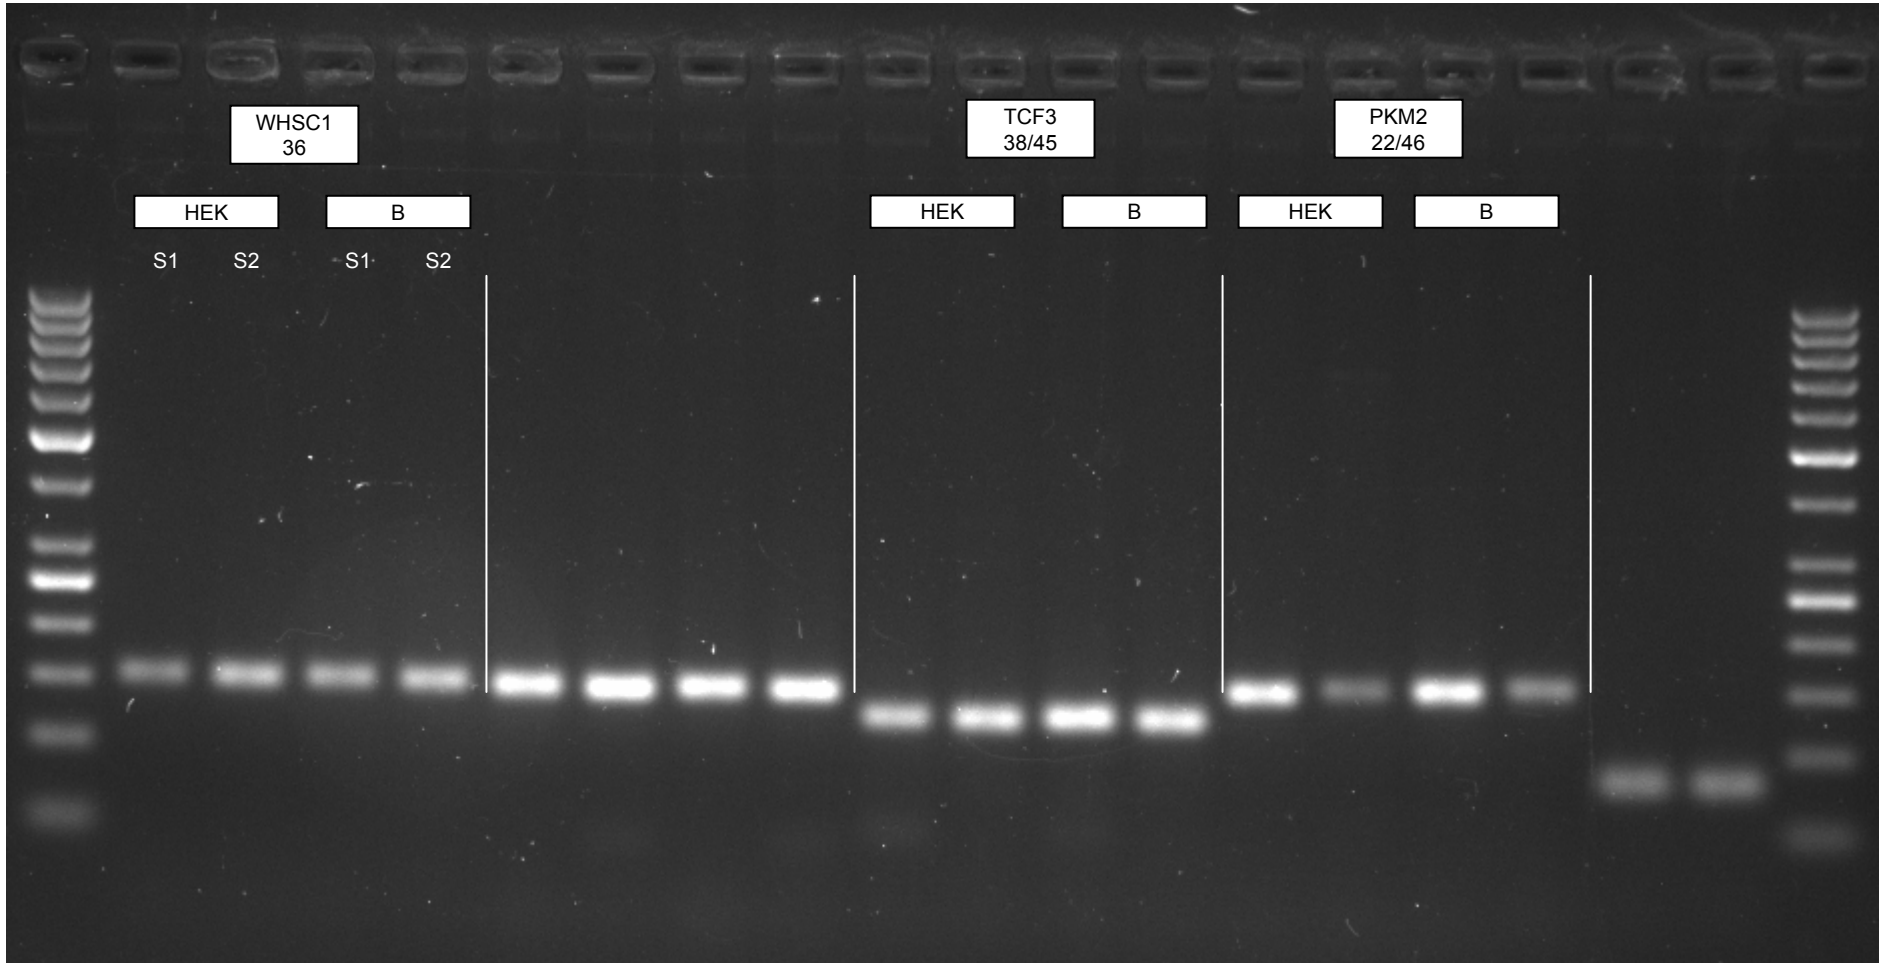

HEKcells 293\_T2 + B-cells HSA 2
